# Supplementary material
Source: Springer Nature journal article supplement (https://www.springermedizin.de/resource/supplementary/13256_2011_2189_MOESM2_ESM.pdf/9649260)

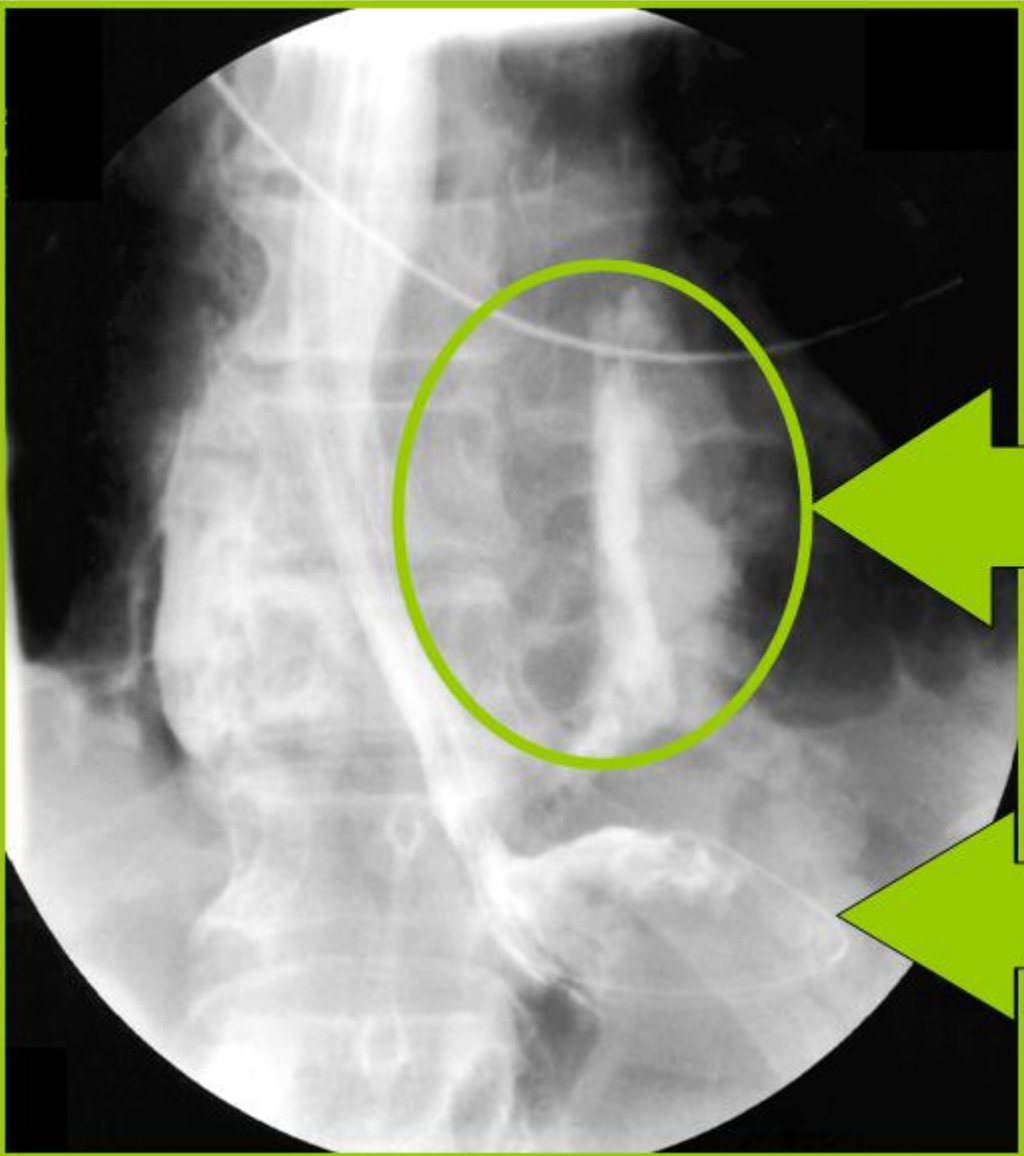

Esophageal Rupture

Oral-Gastric Tube

Supplement: MOESM2 [file 9649260]
